# Supplementary material for: Association between Prenatal, Pre-pregnancy Rainfall and Adult Obesity: Findings from the Community Behavior and Attitude Survey in Tuvalu (COMBAT)
Source: Research Square preprint supplement (doi:10.21203/rs.3.rs-5952290/v1), 2025-02-10
Supplement: Supplementary file 1 [file 68b834aa83841e6c389e355d.docx]

| **Supplemental Table 1.** *Multivariable regressions between annual precipitation exposure before birth on BMI, obesity and severe obesity prevalence, shown in estimate (kg) or odds ratio, 95% confidence interval and p-value a* | | |
| --- | --- | --- |
|  | **Unadjusted model** | **Fully adjusted model b** |
| **(a) BMI** |  |  |
| 3 years before birth | 0.43 (0.12 to 0.73, p=0.007) | 0.25 (-0.07 to 0.57, p=0.119) |
| 4 years before birth | 0.18 (-0.17 to 0.52, p=0.318) | 0.03 (-0.32 to 0.39, p=0.858) |
| 5 years before birth | 0.01 (-0.31 to 0.34, p=0.930) | 0.02 (-0.31 to 0.35, p=0.926) |
| 3-5 year before birth | 0.69 (0.09 to 1.29, p=0.024) | 0.39 (-0.25 to 1.03, p=0.235) |
| **(b) Obesity** |  |  |
| 3 years before birth | 1.04 (0.95-1.13, p=0.380) | 0.98 (0.89-1.07, p=0.626) |
| 4 years before birth | 1.01 (0.92-1.11, p=0.768) | 0.97 (0.88-1.07, p=0.545) |
| 5 years before birth | 1.02 (0.93-1.11, p=0.688) | 1.02 (0.93-1.12, p=0.662) |
| 3-5 year before birth | 1.07 (0.92-1.26, p=0.371) | 0.96 (0.80-1.15, p=0.665) |
| **(c) Severe obesity** |  |  |
| 3 years before birth | 1.08 (0.98-1.19, p=0.122) | 1.06 (0.96-1.17, p=0.273) |
| 4 years before birth | 1.08 (0.97-1.20, p=0.150) | 1.07 (0.96-1.19, p=0.242) |
| 5 years before birth | 1.03 (0.94-1.14, p=0.515) | 1.04 (0.93-1.15, p=0.511) |
| 3-5 year before birth | 1.22 (1.01-1.47, p=0.042) | 1.19 (0.97-1.46, p=0.099) |
| a. Obesity was defined as BMI >30 kg/m2, and severe obesity as BMI >40 kg/m2. | |  |
| b. Adjusted for gender (male or female), age (grouped in ten years), education level (high school or above), NCD diagnosis (having hypertension, diabetes or dyslipidemia), income (>200 AUD or not), and smoking. | | |
| Abbreviation: AUD, Australian dollar; BMI, body mass index; NCD, non-communicable disease. | |  |

| **Supplemental Table 2.** *Multivariable regressions between precipitation exposure during dry seasons before birth on BMI, obesity and severe obesity prevalence, shown in estimate (kg) or odds ratio, 95% confidence interval and p-value a* | | |
| --- | --- | --- |
|  | **Unadjusted model** | **Fully adjusted model b** |
| **(a) BMI** |  |  |
| 3 years before birth | 0.35 (0.05 to 0.66, p=0.023) | 0.31 (-0.00 to 0.63, p=0.052) |
| 4 years before birth | -0.05 (-0.38 to 0.29, p=0.787) | -0.08 (-0.43 to 0.26, p=0.636) |
| 5 years before birth | -0.21 (-0.51 to 0.09, p=0.174) | -0.08 (-0.39 to 0.23, p=0.600) |
| 3-5 year before birth | 0.09 (-0.44 to 0.62, p=0.729) | 0.16 (-0.41 to 0.74, p=0.577) |
| **(b) Obesity** |  |  |
| 3 years before birth | 1.03 (0.95-1.12, p=0.422) | 1.01 (0.92-1.10, p=0.883) |
| 4 years before birth | 0.95 (0.87-1.04, p=0.253) | 0.93 (0.84-1.02, p=0.127) |
| 5 years before birth | 0.97 (0.90-1.05, p=0.449) | 1.00 (0.92-1.09, p=0.911) |
| 3-5 year before birth | 0.96 (0.83-1.10, p=0.556) | 0.94 (0.81-1.11, p=0.484) |
| **(c) Severe obesity** |  |  |
| 3 years before birth | 1.09 (0.99-1.19, p=0.075) | 1.10 (1.00-1.22, p=0.051) |
| 4 years before birth | 1.00 (0.90-1.10, p=0.946) | 1.00 (0.90-1.11, p=0.980) |
| 5 years before birth | 1.01 (0.92-1.11, p=0.822) | 1.04 (0.94-1.14, p=0.469) |
| 3-5 year before birth | 1.10 (0.93-1.29, p=0.273) | 1.15 (0.96-1.37, p=0.122) |
| a. Obesity was defined as BMI >30 kg/m2, and severe obesity as BMI >40 kg/m2. | |  |
| b. Adjusted for gender (male or female), age (grouped in ten years), education level (high school or above), NCD diagnosis (having hypertension, diabetes or dyslipidemia), income (>200 AUD or not), and smoking. | | |
| Abbreviation: AUD, Australian dollar; BMI, body mass index; NCD, non-communicable disease. | | |

| **Supplemental Table 3.** *Multivariable regressions between annual precipitation exposure before birth on BMI, obesity and severe obesity prevalence among* ***female*** *participants, shown in estimate (kg) or odds ratio, 95% confidence interval and p-value a* | | |
| --- | --- | --- |
|  | **Unadjusted model** | **Fully adjusted model b** |
| **(a) BMI** |  |  |
| Year of birth | 0.04 (-0.46 to 0.54, p=0.879) | 0.09 (-0.42 to 0.59, p=0.741) |
| 1 year before birth | 0.27 (-0.18 to 0.72, p=0.238) | 0.17 (-0.30 to 0.64, p=0.473) |
| 2 years before birth | 0.59 (0.13 to 1.05, p=0.011) | 0.46 (-0.02 to 0.93, p=0.060) |
| 3 years before birth | 0.65 (0.21 to 1.09, p=0.004) | 0.53 (0.06 to 1.00, p=0.026) |
| 4 years before birth | 0.20 (-0.30 to 0.71, p=0.428) | 0.10 (-0.42 to 0.61, p=0.711) |
| 5 years before birth | -0.13 (-0.62 to 0.36, p=0.594) | -0.16 (-0.65 to 0.33, p=0.526) |
| Average: 0-2 year before birth | 0.83 (0.07 to 1.60, p=0.033) | 0.67 (-0.13 to 1.48, p=0.101) |
| 3-5 year before birth | 0.80 (-0.06 to 1.66, p=0.067) | 0.56 (-0.37 to 1.48, p=0.239) |
| **(b) Obesity** |  |  |
| Year of birth | 0.85 (0.74 to 0.97, p=0.016) | 0.85 (0.73-0.98, p=0.028) |
| 1 year before birth | 1.06 (0.94 to 1.20, p=0.327) | 1.04 (0.91-1.18, p=0.591) |
| 2 years before birth | 1.13 (1.00 to 1.28, p=0.045) | 1.09 (0.95-1.24, p=0.219) |
| 3 years before birth | 1.05 (0.94 to 1.18, p=0.386) | 0.99 (0.87-1.12, p=0.863) |
| 4 years before birth | 1.02 (0.89 to 1.16, p=0.795) | 0.98 (0.85-1.12, p=0.726) |
| 5 years before birth | 1.01 (0.89 to 1.15, p=0.855) | 1.01 (0.89-1.15, p=0.918) |
| Average: 0-2 year before birth | 1.05 (0.86 to 1.28, p=0.632) | 0.98 (0.78-1.23, p=0.893) |
| 3-5 year before birth | 1.08 (0.87 to 1.34, p=0.500) | 0.95 (0.74-1.22, p=0.700) |
| **(c) Severe obesity** |  |  |
| Year of birth | 1.04 (0.91 to 1.19, p=0.598) | 1.03 (0.89-1.18, p=0.704) |
| 1 year before birth | 1.04 (0.92 to 1.18, p=0.535) | 1.02 (0.89-1.16, p=0.786) |
| 2 years before birth | 1.07 (0.94 to 1.22, p=0.295) | 1.05 (0.92-1.21, p=0.439) |
| 3 years before birth | 1.12 (0.99 to 1.27, p=0.071) | 1.12 (0.98-1.28, p=0.096) |
| 4 years before birth | 1.09 (0.96 to 1.26, p=0.200) | 1.09 (0.94-1.25, p=0.258) |
| 5 years before birth | 1.04 (0.91 to 1.18, p=0.591) | 1.03 (0.90-1.18, p=0.715) |
| Average: 0-2 year before birth | 1.13 (0.91 to 1.42, p=0.265) | 1.09 (0.87-1.38, p=0.472) |
| 3-5 year before birth | 1.29 (1.01 to 1.67, p=0.044) | 1.27 (0.98-1.67, p=0.083) |
| a. Obesity was defined as BMI >30 kg/m2, and severe obesity as BMI >40 kg/m2. | |  |
| b. Adjusted for gender (male or female), age (grouped in ten years), education level (high school or above), NCD diagnosis (having hypertension, diabetes or dyslipidemia), income (>200 AUD or not), and smoking. | | |
| Abbreviation: AUD, Australian dollar; BMI, body mass index; NCD, non-communicable disease. | | |

| **Supplemental Table 4.** *Multivariable regressions between annual precipitation exposure before birth on BMI, obesity and severe obesity prevalence among* ***male*** *participants, shown in estimate (kg) or odds ratio, 95% confidence interval and p-value a* | | |
| --- | --- | --- |
|  | **Unadjusted model** | **Fully adjusted model b** |
| **(a) BMI** |  |  |
| Year of birth | 0.08 (-0.35 to 0.51, p=0.717) | -0.04 (-0.47 to 0.38, p=0.842) |
| 1 year before birth | 0.65 (0.23 to 1.08, p=0.003) | 0.55 (0.13 to 0.98, p=0.011) |
| 2 years before birth | 0.70 (0.29 to 1.11, p=0.001) | 0.56 (0.15 to 0.97, p=0.008) |
| 3 years before birth | 0.15 (-0.28 to 0.58, p=0.493) | -0.02 (-0.46 to 0.41, p=0.910) |
| 4 years before birth | 0.12 (-0.36 to 0.59, p=0.633) | -0.07 (-0.55 to 0.41, p=0.773) |
| 5 years before birth | 0.15 (-0.28 to 0.59, p=0.497) | 0.16 (-0.28 to 0.59, p=0.472) |
| Average: 0-2 year before birth | 1.37 (0.64 to 2.09, p<0.001) | 1.11 (0.37 to 1.86, p=0.003) |
| 3-5 year before birth | 0.49 (-0.34 to 1.32, p=0.249) | 0.13 (-0.77 to 1.02, p=0.781) |
| **(b) Obesity** |  |  |
| Year of birth | 1.02 (0.90 to 1.15, p=0.810) | 0.99 (0.87-1.12, p=0.821) |
| 1 year before birth | 1.19 (1.05 to 1.35, p=0.006) | 1.16 (1.02-1.33, p=0.025) |
| 2 years before birth | 1.26 (1.12 to 1.43, p<0.001) | 1.24 (1.09-1.41, p=0.001) |
| 3 years before birth | 1.02 (0.90 to 1.15, p=0.746) | 0.98 (0.86-1.11, p=0.734) |
| 4 years before birth | 1.01 (0.88 to 1.15, p=0.927) | 0.96 (0.83-1.11, p=0.605) |
| 5 years before birth | 1.02 (0.91 to 1.16, p=0.721) | 1.03 (0.91-1.17, p=0.646) |
| Average: 0-2 year before birth | 1.48 (1.20 to 1.84, p<0.001) | 1.43 (1.14-1.80, p=0.002) |
| 3-5 year before birth | 1.06 (0.84 to 1.34, p=0.600) | 0.98 (0.75-1.28, p=0.885) |
| **(c) Severe obesity** |  |  |
| Year of birth | 0.94 (0.81 to 1.09, p=0.410) | 0.90 (0.77-1.06, p=0.203) |
| 1 year before birth | 1.13 (0.97 to 1.33, p=0.135) | 1.12 (0.95-1.32, p=0.185) |
| 2 years before birth | 1.17 (1.01 to 1.37, p=0.042) | 1.15 (0.98-1.36, p=0.082) |
| 3 years before birth | 1.01 (0.87 to 1.18, p=0.891) | 0.99 (0.84-1.16, p=0.891) |
| 4 years before birth | 1.05 (0.89 to 1.24, p=0.588) | 1.04 (0.87-1.24, p=0.696) |
| 5 years before birth | 1.02 (0.88 to 1.19, p=0.769) | 1.03 (0.88-1.21, p=0.684) |
| Average: 0-2 year before birth | 1.23 (0.94 to 1.65, p=0.154) | 1.16 (0.88-1.58, p=0.315) |
| 3-5 year before birth | 1.08 (0.81 to 1.46, p=0.600) | 1.06 (0.77-1.48, p=0.717) |
| a. Obesity was defined as BMI >30 kg/m2, and severe obesity as BMI >40 kg/m2. | |  |
| b. Adjusted for gender (male or female), age (grouped in ten years), education level (high school or above), NCD diagnosis (having hypertension, diabetes or dyslipidemia), income (>200 AUD or not), and smoking. | | |
| Abbreviation: AUD, Australian dollar; BMI, body mass index; NCD, non-communicable disease. | | |

| **Supplemental Table 5.** *Multivariable regressions between annual precipitation exposure before birth on waist circumference, prevalence of high waist circumference, hypertension and diabetes at adulthood, shown in estimate (cm) or odds ratio, 95% confidence interval and p-value a* | | |
| --- | --- | --- |
|  | **Unadjusted model** | **Fully adjusted model** |
| **(a) Waist circumference** |  |  |
| Year of birth | 0.64 (-0.03 to 1.32, p=0.063) | 0.55 (-0.13 to 1.23, p=0.111) |
| 1 year before birth | 1.02 (0.38 to 1.65, p=0.002) | 0.88 (0.24 to 1.52, p=0.007) |
| 2 years before birth | 0.47 (-0.16 to 1.11, p=0.143) | 0.18 (-0.46 to 0.82, p=0.582) |
| 3 years before birth | 0.55 (-0.07 to 1.18, p=0.084) | 0.16 (-0.48 to 0.80, p=0.623) |
| 4 years before birth | 0.42 (-0.28 to 1.11, p=0.243) | 0.16 (-0.55 to 0.86, p=0.660) |
| 5 years before birth | -0.27 (-0.93 to 0.39, p=0.427) | -0.20 (-0.86 to 0.46, p=0.548) |
| Average: 0-2 year before birth | 1.93 (0.85 to 3.02, p<0.001) | 1.56 (0.45 to 2.67, p=0.006) |
| 3-5 year before birth | 0.75 (-0.46 to 1.96, p=0.222) | 0.13 (-1.16 to 1.41, p=0.848) |
| **(b) High waist circumference** |  |  |
| Year of birth | 1.06 (0.95-1.18, p=0.284) | 1.03 (0.92-1.16, p=0.556) |
| 1 year before birth | 1.04 (0.94-1.16, p=0.417) | 1.03 (0.92-1.15, p=0.652) |
| 2 years before birth | 1.02 (0.92-1.13, p=0.668) | 0.99 (0.89-1.11, p=0.921) |
| 3 years before birth | 1.03 (0.93-1.14, p=0.539) | 0.98 (0.88-1.09, p=0.713) |
| 4 years before birth | 1.02 (0.91-1.13, p=0.785) | 0.96 (0.85-1.08, p=0.512) |
| 5 years before birth | 0.99 (0.89-1.10, p=0.878) | 0.99 (0.89-1.11, p=0.892) |
| Average: 0-2 year before birth | 1.11 (0.94-1.32, p=0.213) | 1.06 (0.87-1.28, p=0.537) |
| Average: 3-5 year before birth | 1.04 (0.86-1.26, p=0.657) | 0.92 (0.72-1.15, p=0.463) |
| **(c) Hypertension** |  |  |
| Year of birth | 1.09 (0.97-1.23, p=0.170) | 1.03 (0.90-1.19, p=0.643) |
| 1 year before birth | 1.16 (1.03-1.30, p=0.016) | 1.11 (0.97-1.28, p=0.130) |
| 2 years before birth | 1.06 (0.94-1.20, p=0.322) | 1.03 (0.90-1.18, p=0.690) |
| 3 years before birth | 0.99 (0.88-1.12, p=0.901) | 0.96 (0.84-1.10, p=0.566) |
| 4 years before birth | 1.05 (0.92-1.20, p=0.462) | 1.07 (0.92-1.23, p=0.379) |
| 5 years before birth | 0.99 (0.87-1.12, p=0.883) | 1.07 (0.93-1.24, p=0.339) |
| Average: 0-2 year before birth | 1.30 (1.05-1.63, p=0.020) | 1.16 (0.93-1.46, p=0.186) |
| Average: 3-5 year before birth | 1.02 (0.81-1.28, p=0.896) | 1.10 (0.87-1.42, p=0.424) |
| **(d) Diabetes** |  |  |
| Year of birth | 1.09 (0.95-1.25, p=0.236) | 1.04 (0.89-1.21, p=0.642) |
| 1 year before birth | 1.07 (0.94-1.23, p=0.298) | 0.99 (0.86-1.15, p=0.905) |
| 2 years before birth | 0.99 (0.87-1.14, p=0.926) | 0.92 (0.79-1.06, p=0.261) |
| 3 years before birth | 1.04 (0.91-1.19, p=0.569) | 0.99 (0.85-1.14, p=0.857) |
| 4 years before birth | 0.98 (0.84-1.14, p=0.796) | 0.96 (0.82-1.12, p=0.573) |
| 5 years before birth | 0.86 (0.74-1.00, p=0.048) | 0.89 (0.76-1.04, p=0.131) |
| Average: 0-2 year before birth | 1.12 (0.88-1.43, p=0.375) | 0.95 (0.75-1.21, p=0.684) |
| Average: 3-5 year before birth | 0.87 (0.68-1.13, p=0.288) | 0.85 (0.66-1.11, p=0.234) |
| a. Adjusted for gender (male or female), age (grouped in ten years), education level (high school or above), NCD diagnosis (having hypertension, diabetes or dyslipidemia), income (>200 AUD or not), and smoking. | | |
| Abbreviation: AUD, Australian dollar; BMI, body mass index; NCD, non-communicable disease. | | |

**Supplemental Figure 1.** *Correlation of Precipitation Results between ERA5 Prediction and Monitoring Stations in Tuvalu.*

*
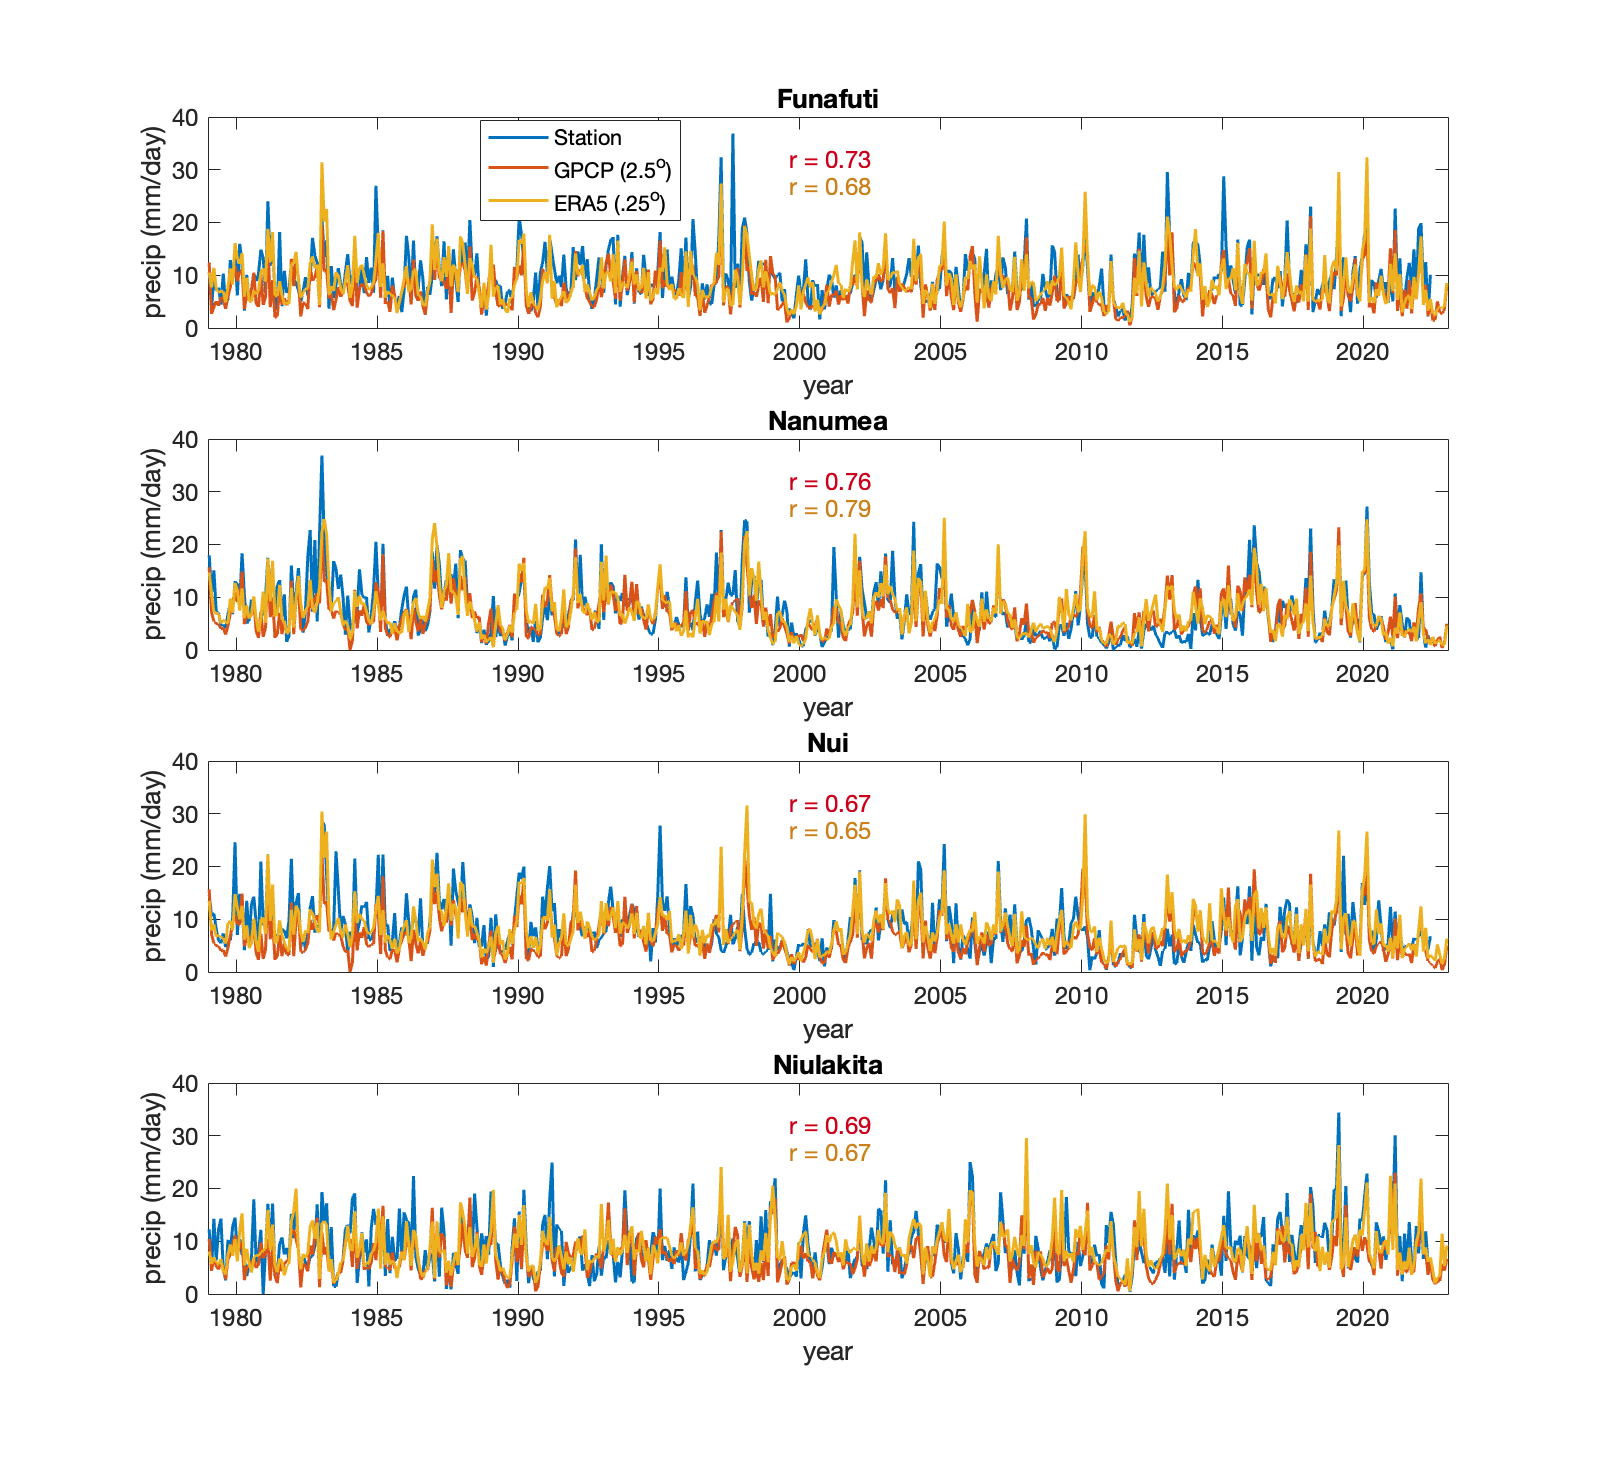
*
